# Supplementary material for: Impact of complement component 3/4/5 single nucleotide polymorphisms on renal transplant recipients with antibody-mediated rejection
Source: PubMed Central journal article supplement (PMC5706894; doi:10.18632/oncotarget.21788), 2017-10-10
Supplement: oncotarget-08-94539-s001.pdf [file oncotarget-08-94539-s001.pdf]

## **Impact of complement component 3/4/5 single nucleotide polymorphisms on renal transplant recipients with antibody-mediated rejection**

### **SUPPLEMENTARY MATERIALS**

**Supplementary Table 1: Genotype frequencies of *C3* genetic polymorphisms in 199 Chinese subjects**

See Supplementary File 1

Supplementary Table 2: Genotype frequencies of *C4* genetic polymorphisms in 199 Chinese subjects

| Location/Genotypes   | Stable group (n=131) | ABMR group (n=68) |
|----------------------|----------------------|-------------------|
| <b>chr6:31963786</b> |                      |                   |
| CC                   | 121                  | 64                |
| CA                   | 10                   | 4                 |
| <b>chr6:31964228</b> |                      |                   |
| AA                   | 116                  | 59                |
| AG                   | 13                   | 8                 |
| GG                   | 2                    | 1                 |
| <b>chr6:31964391</b> |                      |                   |
| CC                   | 130                  | 66                |
| CG                   | 1                    | 2                 |
| <b>chr6:31964584</b> |                      |                   |
| CC                   | 116                  | 58                |
| CT                   | 15                   | 10                |
| <b>chr6:31994974</b> |                      |                   |
| GG                   | 117                  | 59                |
| GA                   | 14                   | 9                 |
| <b>chr6:31996524</b> |                      |                   |
| CC                   | 98                   | 50                |
| CA                   | 27                   | 18                |
| AA                   | 6                    | 0                 |
| <b>chr6:31996966</b> |                      |                   |
| GG                   | 100                  | 50                |
| GA                   | 29                   | 16                |
| AA                   | 2                    | 2                 |
| <b>chr6:31997321</b> |                      |                   |
| CC                   | 126                  | 66                |
| CT                   | 5                    | 2                 |
| <b>chr6:31997401</b> |                      |                   |
| GG                   | 81                   | 45                |
| GA                   | 49                   | 23                |
| AA                   | 1                    | 0                 |

ABMR, antibody-mediated rejection.

**Supplementary Table 3: Genetic distributions of C5 polymorphisms between ABMR and stable group**

See Supplementary File 2
